# Supplementary material
Source: PubMed Central journal article supplement (PMC3315696)
Supplement: NIHMS365559-supplement-Supplement.pdf [file NIHMS365559-supplement-Supplement.pdf]

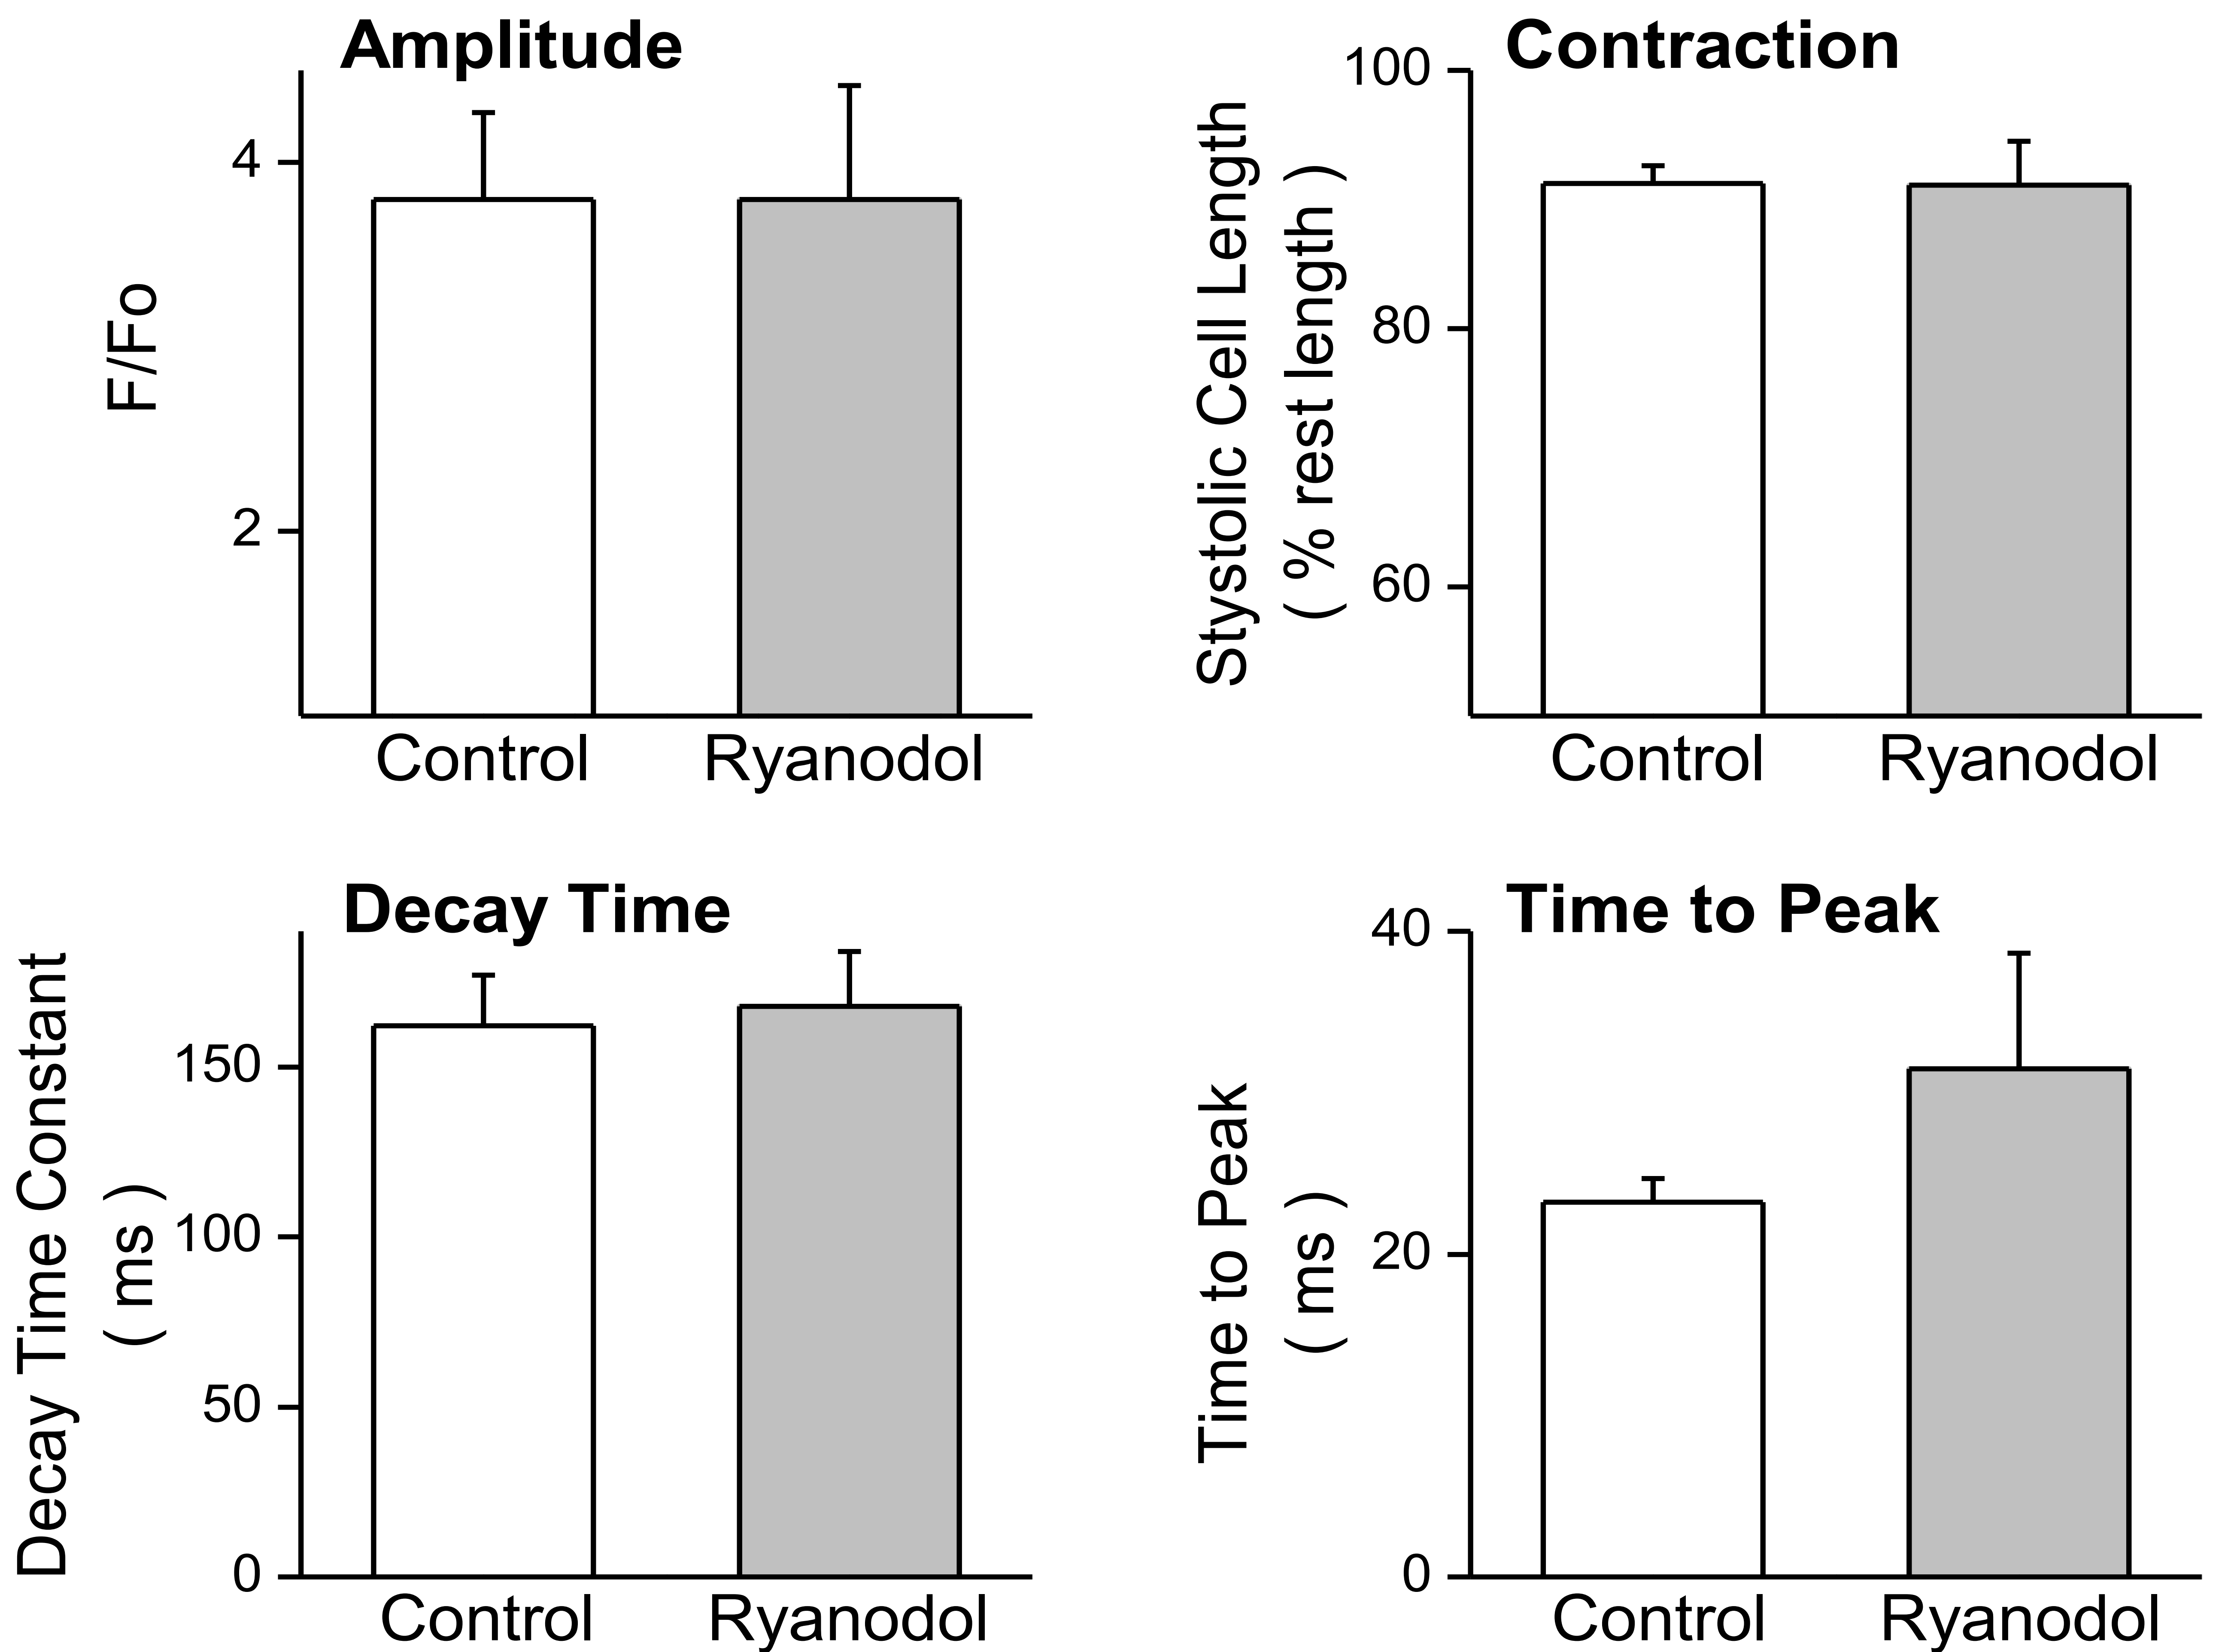

**Figure Legend:** Ryanodol action on electrically stimulated  $\text{Ca}^{2+}$  transients in Fluo-4 loaded intact rat ventricular myocytes. Bar graphs summarize systolic  $\text{Ca}^{2+}$  transient amplitude (measured as peak  $F/F_0$ ), cell shortening, decay time and time to peak in the absence (control) and presence of  $50 \mu\text{M}$  ryanodol. Data are mean  $\pm$  SEM (n=6 cells).
